# Supplementary material for: A rare loss-of-function variant of ADAM17 is associated with late-onset familial Alzheimer disease
Source: PubMed Central journal article supplement (PMC7042727; doi:10.1038/s41380-018-0091-8), 2018-07-09
Supplement: 41380_2018_91_MOESM4_ESM.pdf [file 41380_2018_91_MOESM4_ESM.pdf]

Supplementary Table 1: Exonic candidate variants co-segregating with AD in the analyzed family members and likely being pathogenic.

| Gene name | chromosome | begin     | end      | refGene.aachange                                                                                                                                                                                                                                                                                                                                                                                                                           | ExonicFunc.refGene | SIFT_pred | Polyphe2_HDIV_pred | Polyphe2_HVAR_pred | LRT_pred | MutationTaster_pred | PROVEAN_pred | fathmm-MKL_coding_pred | MetaSVM_pred | DELPREDSUM | DANN_score | CADD_raw | Condel              | GERP++_RS           | Sifhy_29w_ay_logOdds | DiseaseCausalProb_ExtVarTrainedModel | IsWithinCandidateGene | LODscore | AD-PP1 interactions           |                                                                                                                                                                                                                                                                                                                                                                                                                                                                                                                                                                      |
|-----------|------------|-----------|----------|--------------------------------------------------------------------------------------------------------------------------------------------------------------------------------------------------------------------------------------------------------------------------------------------------------------------------------------------------------------------------------------------------------------------------------------------|--------------------|-----------|--------------------|--------------------|----------|---------------------|--------------|------------------------|--------------|------------|------------|----------|---------------------|---------------------|----------------------|--------------------------------------|-----------------------|----------|-------------------------------|----------------------------------------------------------------------------------------------------------------------------------------------------------------------------------------------------------------------------------------------------------------------------------------------------------------------------------------------------------------------------------------------------------------------------------------------------------------------------------------------------------------------------------------------------------------------|
| ADAM17    | chr2       | 9666348   | 9666349  | ADAM17.NM_001145853:exon6:c.G644T;p.1215I                                                                                                                                                                                                                                                                                                                                                                                                  | nonsynonymous SNV  | D         | D                  | F                  | D        | D                   | D            | D                      | D            | T          | 7          | 0.978    | 4.685               | 0.506852763834606   | 3.65                 | 11.201                               | 0.14749289300958188   | N        | -1.2033                       | ADAM17<<<br>>MMP14,ADAM17<<<br>>MMP9,ADAM17<<<br>>ACE,ADAM17<<<br>>APP,ADAM17<<<br>>NOTCH1,ADAM17<<<br>>FURIN,ADAM17<<<br>>NOTCH3,ADAM17<<<br>>TIMP2,ADAM17<<<br>>ADAM10,ADAM17<<<br>>NOTCH2,ADAM17<<<br>>SORT1,ADAM17<<<br>>TIMPSF11,ADAM17<<<br>>MMP2,ADAM17<<<br>>TIMP1,ADAM17<<<br>>MMP1,ADAM17<<<br>>NGFR,ADAM17<<<br>>TIMPSF1A,ADAM17<<<br>>CXCL1,ADAM17<<<br>>BONF,ADAM17<<<br>>NOTCH4,ADAM17<<<br>>KL,ADAM17<<<br>>TIMPSF1B,ADAM17<<<br>>CXCL12,ADAM17<<<br>>MMP9,ADAM17<<<br>>VEGFA,ADAM17<<<br>>ADAM12,ADAM17<<<br>>ERBB4,ADAM17<<<br>>MMP3,ADAM17<<-BACE1 |
| USP34     | chr2       | 61566815  | 61566816 | USP34.NM_014709:exon17:c.G2501T;p.G834V                                                                                                                                                                                                                                                                                                                                                                                                    | nonsynonymous SNV  | T         | D                  | D                  | D        | D                   | N            | D                      | D            | T          | 5          | 0.596    | 2.267               | 0.3425097549096623  | 6.59                 | 19.588                               | 0.2455167145666326    | N        | 0.0000                        |                                                                                                                                                                                                                                                                                                                                                                                                                                                                                                                                                                      |
| WFS1      | chr4       | 6293694   | 6293695  | WFS1.NM_001145853:exon6:c.G683A;p.R228H;WFS1.NM_006009:exon6:c.G683A;p.R228H                                                                                                                                                                                                                                                                                                                                                               | nonsynonymous SNV  | D         | D                  | D                  | D        | D                   | N            | D                      | D            | T          | 7          | 1.000    | 8.866               | 0.8332741802088592  | 3.45                 | 12.360                               | 0.13150459923806931   | N        | 0.0000                        | WFS1<<->GSK3A,WFS1<<->FTIC,WFS1<<->CDH23,WFS1<<->TCF7L2,WFS1<<->LHNA,WFS1<<->TPP1,WFS1<<->ELN                                                                                                                                                                                                                                                                                                                                                                                                                                                                        |
| TBC1D14   | chr4       | 6925579   | 6925580  | TBC1D14.NM_001113361:exon2:c.C464T;p.S155F,T                                                                                                                                                                                                                                                                                                                                                                                               | nonsynonymous SNV  | D         | D                  | D                  | D        | D                   | N            | D                      | D            | T          | 6          | 0.997    | 4.829               | 0.37223232523863044 | 6.73                 | 16.872                               | 0.21728023875477848   | N        | 0.0000                        |                                                                                                                                                                                                                                                                                                                                                                                                                                                                                                                                                                      |
| GRS125    | chr4       | 22422614  | 22422615 | GRS125.NM_145290:exon13:c.G1703A;p.R568H                                                                                                                                                                                                                                                                                                                                                                                                   | nonsynonymous SNV  | T         | D                  | D                  | D        | D                   | N            | D                      | D            | T          | 5          | 0.965    | 6.908               | 0.48120971734929573 | 5.1                  | 18.051                               | 0.21279519973079794   | N        | 0.0000                        |                                                                                                                                                                                                                                                                                                                                                                                                                                                                                                                                                                      |
| LIMCH1    | chr4       | 41615578  | 41615579 | LIMCH1.NM_001112719:exon2:c.C121T;p.R41C,LIMCH1.NM_001112720:exon2:c.C121T;p.R41C,LIMCH1.NM_001112717:exon7:c.C583T;p.R195C,LIMCH1.NM_001112718:exon7:c.C583T;p.R195C,LIMCH1.NM_014988:exon7:c.C583T;p.R195C                                                                                                                                                                                                                               | nonsynonymous SNV  | D         | D                  | D                  | N        | D                   | D            | D                      | D            | T          | 6          | 0.899    | 7.293               | 0.48865070928314363 | 8.24                 | 11.422                               | 0.16255421454386143   | N        | 0.0000                        |                                                                                                                                                                                                                                                                                                                                                                                                                                                                                                                                                                      |
| TNIP1     | chr5       | 150416472 | 15E408   | TNIP1.NM_001252386:exon12:c.G1114C;p.E372Q,TNIP1.NM_001258456:exon12:c.G1273C;p.E425Q,TNIP1.NM_001258456:exon12:c.G1273C;p.E425Q,TNIP1.NM_001252385:exon13:c.G1273C;p.E425Q,TNIP1.NM_001252380:exon13:c.G1273C;p.E425Q,TNIP1.NM_001252391:exon13:c.G1273C;p.E425Q,TNIP1.NM_001252392:exon13:c.G1273C;p.E425Q,TNIP1.NM_001252393:exon13:c.G1273C;p.E425Q,TNIP1.NM_001258454:exon13:c.G1273C;p.E425Q,TNIP1.NM_000508:exon13:c.G1273C;p.E425Q | nonsynonymous SNV  | T         | D                  | D                  | D        | D                   | N            | D                      | D            | T          | 5          | 0.998    | 6.136               | 0.4660015681088525  | 6.53                 | 19.470                               | 0.1921620000290765    | N        | 0.0000                        | TNIP1<<->TNFAIP3,TNIP1<<->NFKB1                                                                                                                                                                                                                                                                                                                                                                                                                                                                                                                                      |
| DAAM2     | chr6       | 39869131  | 39869132 | DAAM2.NM_001201427:exon24:c.G2866A;p.E956K                                                                                                                                                                                                                                                                                                                                                                                                 | nonsynonymous SNV  | D         | D                  | F                  | D        | D                   | D            | D                      | T            | 7          | 0.999      | 5.809    | 0.49086129330090683 | 8.63                | 14.178               | 0.1828870149983611                   | N                     | 0.0000   | DAAM2<<->DVL1,DAAM2<<->CELSR2 |                                                                                                                                                                                                                                                                                                                                                                                                                                                                                                                                                                      |
| DDHD2     | chr8       | 38107282  | 38107283 | DDHD2.NM_001164232:exon11:c.A1306C;p.K436Q,DDHD2.NM_015214:exon11:c.A1306C;p.K436Q                                                                                                                                                                                                                                                                                                                                                         | nonsynonymous SNV  | D         | D                  | D                  | D        | D                   | D            | D                      | T            | 7          | 0.995      | 5.304    | 0.6272892683247199  | 8.8                 | 15.094               | 0.306567171410914                    | N                     | -1.2033  |                               |                                                                                                                                                                                                                                                                                                                                                                                                                                                                                                                                                                      |
| ADRA2A    | chr10      | 112838908 | 113E08   | ADRA2A.NM_000681:exon11:c.G1355C;p.K385N                                                                                                                                                                                                                                                                                                                                                                                                   | nonsynonymous SNV  | D         | D                  | D                  | D        | D                   | D            | D                      | D            | T          | 7          | 0.991    | 4.155               | 0.6219595917783705  | -3.02                | 11.443                               | 0.15734106894419156   | N        | 0.0000                        |                                                                                                                                                                                                                                                                                                                                                                                                                                                                                                                                                                      |
| TSC2D1    | chr13      | 45147304  | 45147305 | TSC2D1.NM_183422:exon1:c.A2906T;p.D969V                                                                                                                                                                                                                                                                                                                                                                                                    | nonsynonymous SNV  | D         | D                  | D                  | D        | D                   | D            | D                      | T            | 7          | 0.992      | 4.006    | 0.43350670955132221 | 8.16                | 14.974               | 0.177355402267678                    | N                     | 0.0000   |                               |                                                                                                                                                                                                                                                                                                                                                                                                                                                                                                                                                                      |

evidence for pathogenicity deleterious parameter

D deleterious sum of deleteri>DANN>0.9 CADD >1 Condel > 0.5 protein disruptive GERP>3 Sifhy > 10 P>0.3 Yes LODscore>1

# number of rare (MAF<0.01) exonic and splicing variants seoregating with the disease  
nonsynonymous 49  
synonymous 23  
frameshift indel 3  
nonframeshift indel 5  
splicing 7
